# Supplementary material
Source: publisher site journal article supplement (https://www.dovepress.com/article/333958)
Supplement: Supplementary file 1 [file get_supplementary_file.php]

Supplementary Table 1. Pearson’s correlation coefficients

| **Question**  **Pair** | **correlation**  **coefficients** |  | **Question**  **Pair** | **correlation**  **coefficients** |  | **Question**  **Pair** | **correlation**  **coefficients** |  | **Question**  **Pair** | **correlation**  **coefficients** |
| --- | --- | --- | --- | --- | --- | --- | --- | --- | --- | --- |
|  |  |  |
| Q6/Q7 | 0.7443 |  | Q6/Q10 | 0.5663 |  | Q10/Q14 | 0.4124 |  | Q3/Q5 | 0.3618 |
| Q1/Q2 | 0.7349 |  | Q7/Q15 | 0.5518 |  | Q8/Q12 | 0.4082 |  | Q4/Q6 | 0.3575 |
| Q13/Q15 | 0.695 |  | Q6/Q13 | 0.5498 |  | Q7/Q14 | 0.4079 |  | Q5/Q8 | 0.3568 |
| Q8/Q10 | 0.6849 |  | Q8/Q11 | 0.4912 |  | Q3/Q9 | 0.4053 |  | Q10/Q12 | 0.3549 |
| Q6/Q8 | 0.6736 |  | Q13/Q14 | 0.4759 |  | Q5/Q9 | 0.4053 |  | Q2/Q10 | 0.3456 |
| Q7/Q8 | 0.6678 |  | Q9/Q15 | 0.4757 |  | Q3/Q10 | 0.4046 |  | Q12/Q15 | 0.339 |
| Q7/Q10 | 0.6404 |  | Q7/Q9 | 0.4713 |  | Q9/Q14 | 0.4045 |  | Q7/Q11 | 0.3382 |
| Q8/Q9 | 0.6352 |  | Q6/Q14 | 0.468 |  | Q1/Q3 | 0.4043 |  | Q5/Q13 | 0.3324 |
| Q8/Q13 | 0.6263 |  | Q11/Q12 | 0.4573 |  | Q5/Q7 | 0.4024 |  | Q9/Q12 | 0.3311 |
| Q9/Q10 | 0.6198 |  | Q8/Q14 | 0.4478 |  | Q12/Q14 | 0.3993 |  | Q10/Q11 | 0.3282 |
| Q8/Q15 | 0.6141 |  | Q5/Q6 | 0.4424 |  | Q10/Q15 | 0.3983 |  | Q3/Q11 | 0.327 |
| Q6/Q15 | 0.5966 |  | Q6/Q11 | 0.4389 |  | Q3/Q6 | 0.3947 |  | Q9/Q11 | 0.3266 |
| Q10/Q13 | 0.5929 |  | Q1/Q5 | 0.4382 |  | Q12/Q13 | 0.3931 |  | Q2/Q13 | 0.321 |
| Q6/Q9 | 0.5838 |  | Q2/Q5 | 0.4372 |  | Q2/Q6 | 0.3894 |  | Q1/Q9 | 0.3124 |
| Q3/Q2 | 0.5792 |  | Q9/Q13 | 0.4325 |  | Q4/Q5 | 0.3878 |  | Q2/Q7 | 0.304 |
| Q14/Q15 | 0.5743 |  | Q3/Q8 | 0.4301 |  | Q2/Q8 | 0.3641 |  | Q3/Q12 | 0.3005 |
| Q7/Q13 | 0.5689 |  | Q2/Q9 | 0.4198 |  | Q6/Q12 | 0.3627 |  | Q4/Q7 | 0.2986 |
|  |  |  |  |  |  |  |  |  |  |  |

| **Question**  **Pair** | **correlation**  **coefficients** |  | **Question**  **Pair** | **correlation**  **coefficients** |  | **Question**  **Pair** | **correlation**  **coefficients** |
| --- | --- | --- | --- | --- | --- | --- | --- |
|  |  |
| Q1/Q8 | 0.2929 |  | Q1/Q11 | 0.2533 |  | Q2/Q14 | 0.1551 |
| Q5/Q10 | 0.2884 |  | Q1/Q15 | 0.2454 |  | Q1/Q12 | 0.1442 |
| Q3/Q7 | 0.2877 |  | Q1/Q10 | 0.232 |  | Q4/Q14 | 0.1334 |
| Q2/Q12 | 0.2869 |  | Q1/Q6 | 0.2308 |  | Q4/Q12 | -0.08 |
| Q4/Q10 | 0.2849 |  | Q4/Q8 | 0.2301 |  |  |  |
| Q2/Q11 | 0.2848 |  | Q1/Q7 | 0.2219 |  |  |  |
| Q5/Q15 | 0.2842 |  | Q3/Q14 | 0.2215 |  |  |  |
| Q3/Q13 | 0.2836 |  | Q2/Q4 | 0.207 |  |  |  |
| Q11/Q15 | 0.2745 |  | Q3/Q15 | 0.2059 |  |  |  |
| Q5/Q14 | 0.2722 |  | Q1/Q14 | 0.2031 |  |  |  |
| Q11/Q14 | 0.2709 |  | Q5/Q12 | 0.2013 |  |  |  |
| Q7/Q12 | 0.2666 |  | Q5/Q11 | 0.2004 |  |  |  |
| Q2/Q15 | 0.2624 |  | Q4/Q15 | 0.1888 |  |  |  |
| Q1/Q13 | 0.2609 |  | Q4/Q9 | 0.1869 |  |  |  |
| Q4/Q13 | 0.2576 |  | Q1/Q4 | 0.1852 |  |  |  |
| Q11/Q13 | 0.2549 |  | Q3/Q4 | 0.1696 |  |  |  |
| Q1/Q11 | 0.2533 |  | Q4/Q11 | 0.1606 |  |  |  |
|  |  |  |  |  |  |  |  |

**
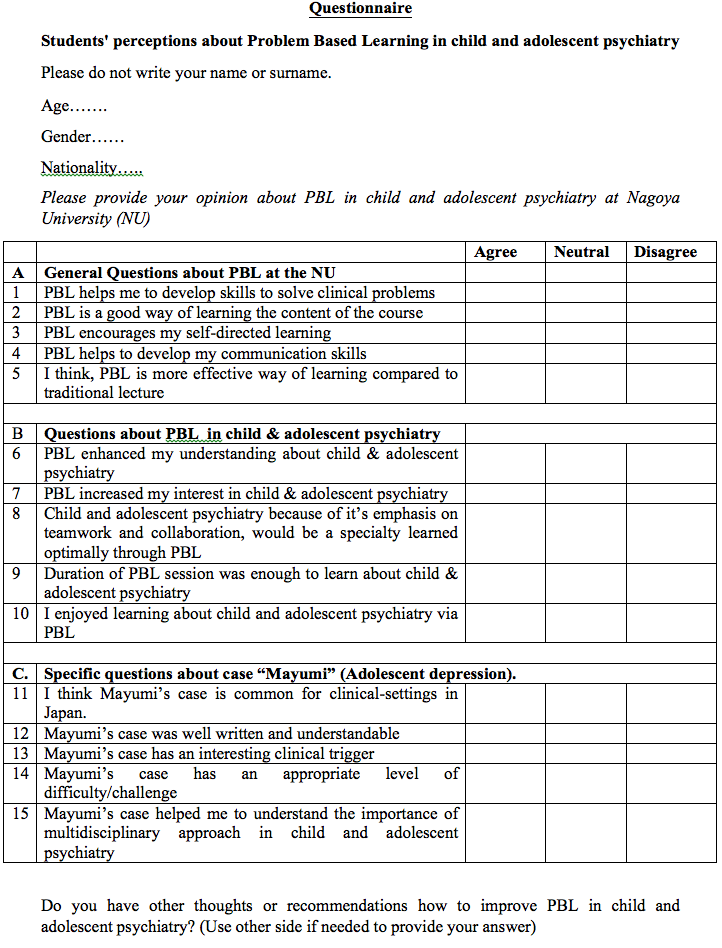
**
